# Supplementary material for: Effectiveness of Fecal Microbiota Transplantation for Weight Loss in Patients With Obesity Undergoing Bariatric Surgery: A Randomized Clinical Trial
Source: PubMed Central journal article supplement (PMC9856235; doi:10.1001/jamanetworkopen.2022.47226), 2022-12-16
Supplement: jamanetwopen-e2247226-s003.pdf [file jamanetwopen-e2247226-s003.pdf]

## Data Sharing Statement

Lahtinen. Effectiveness of Fecal Microbiota Transplantation for Weight Loss in Patients With Obesity Undergoing Bariatric Surgery. *JAMA Netw Open*. Published December 16, 2022. doi:10.1001/jamanetworkopen.2022.47226

### Data

**Data available:** Yes

**Data types:** Deidentified participant data

**How to access data:** [perttu.lahtinen@phhyky.fi](mailto:perttu.lahtinen@phhyky.fi)

**When available:** With publication

### Supporting Documents

**Document types:** None

### Additional Information

**Who can access the data:** researchers whose proposed use of the data has been approved

**Types of analyses:** for any purpose

**Mechanisms of data availability:** after approval of a proposal
